# Supplementary material
Source: publisher figshare collection journal article supplement (https://acs.figshare.com/ndownloader/files/3845443)
Supplement: Supplementary file 1 [file 3845443]

## Supporting Information

### Superhydrophobic Cuprous Oxide Nanostructures on Phosphor-Copper Meshes and Their Oil–Water Separation and Oil Spill Cleanup

Ling-Hao Kong<sup>†,‡</sup>, Xin-Hua Chen<sup>§</sup>, Lai-Gui Yu<sup>†</sup>, Zhi-Shen Wu<sup>†</sup>, and Ping-Yu Zhang<sup>\*,†</sup>

<sup>†</sup> Key Laboratory of Ministry of Education for Special Functional Materials, Henan University, Kaifeng 475004, People's Republic of China

<sup>‡</sup> Rizhao Environmental Monitor Station, Rizhao 276800, People's Republic of China

<sup>§</sup> School of Chemistry and Chemical Engineering, Xuchang University, Xuchang 461000, People's Republic of China

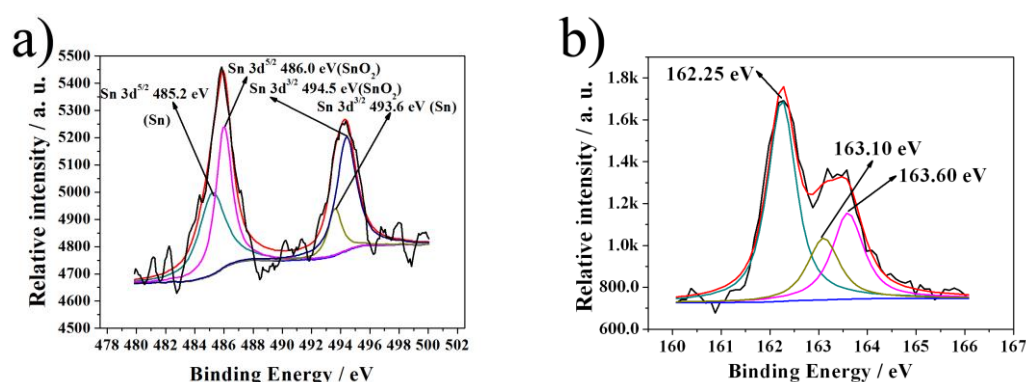

**Figure S1.** High-resolution XPS spectra of (a) Sn 3d region of as-prepared phosphor-copper mesh, (b) S 2p region of as-prepared Cu<sub>2</sub>O nanostructure modified with 1-dodecanethiol (reaction conditions: 25 °C, 3 h).

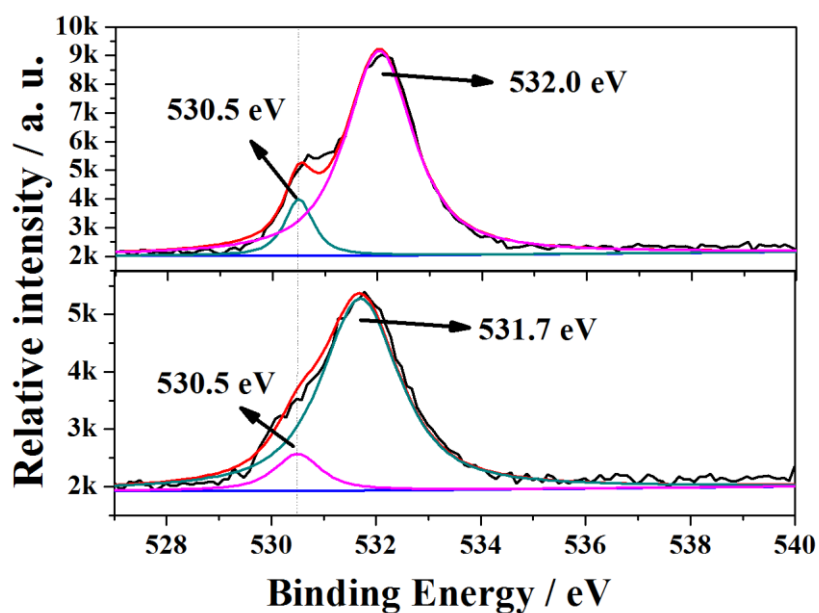

**Figure S2.** The high-resolution XPS spectra of O 1s region of as-prepared Cu<sub>2</sub>O nanostructures (upper part) and the as-prepared Cu<sub>2</sub>O nanostructures modified with 1-dodecanethiol (lower part).

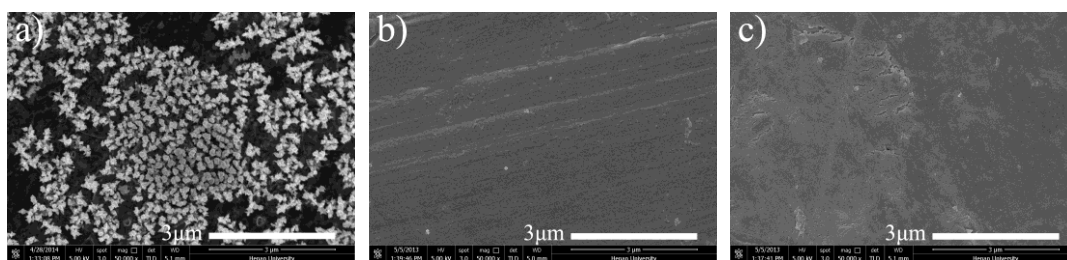

**Figure S3.** (a) SEM image of Cu<sub>2</sub>O nanostructure on phosphor-copper mesh (prepared in double distilled water at a room temperature of 25 °C and a reaction time of 3 h); (b) SEM image of the surface of copper mesh (prepared in distilled water at a room temperature of 25 °C and a reaction time of 3 h); (c) SEM image of the surface of phosphor-copper mesh (prepared in distilled water at a room temperature of 25 °C and a reaction time of 3 h without washing with nitric acid).

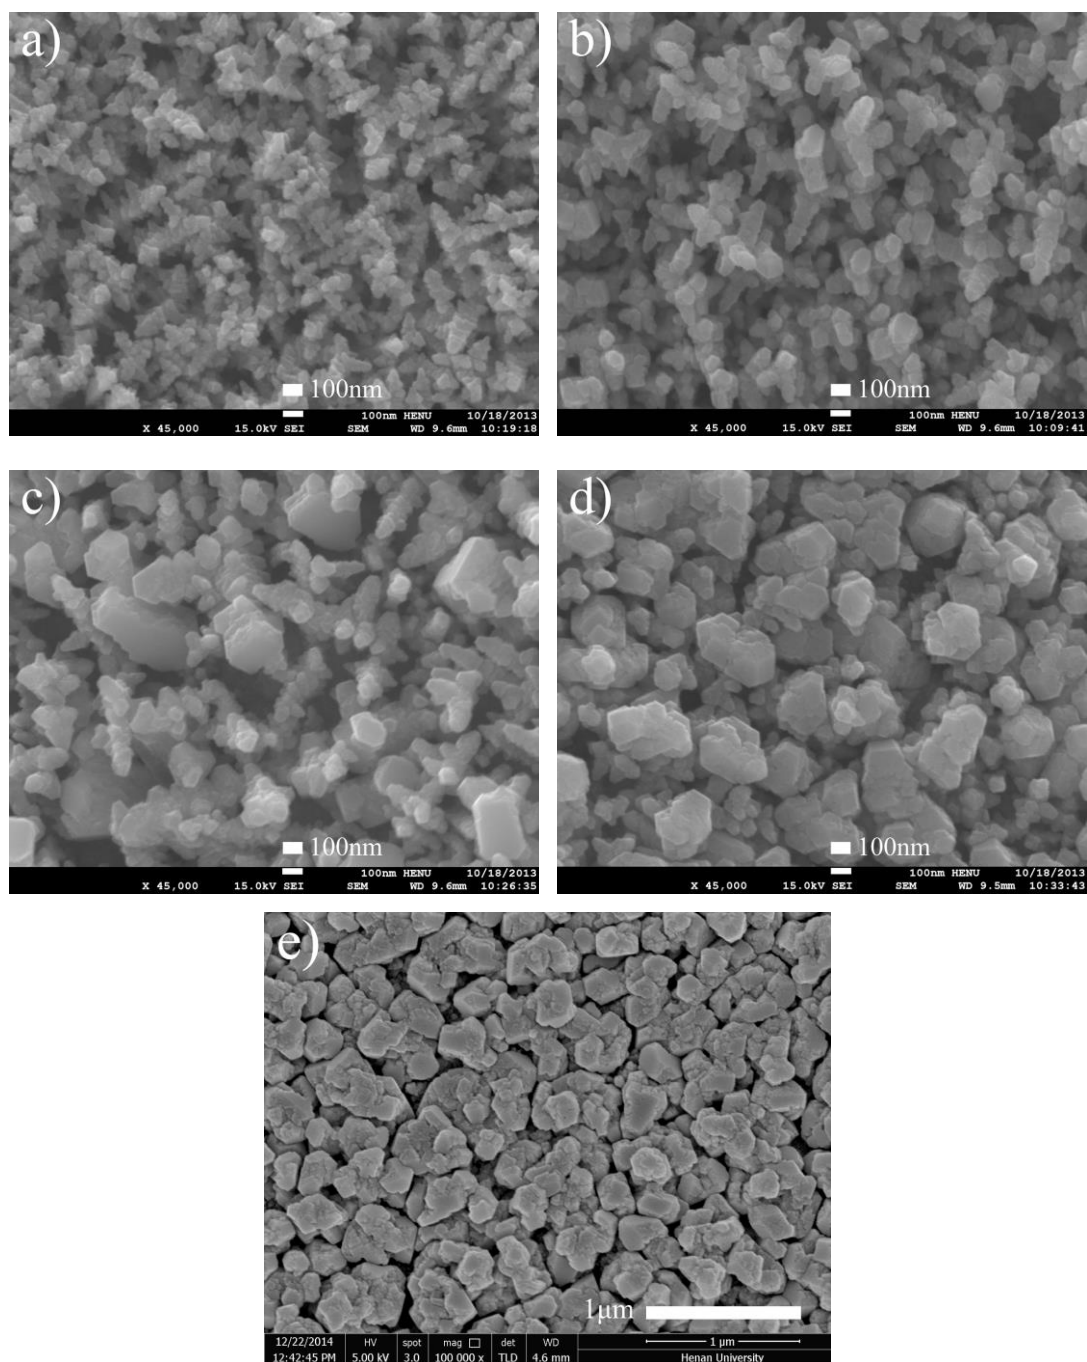

**Figure S4.** High-magnification SEM images of  $\text{Cu}_2\text{O}$  nanostructures prepared on phosphor-copper mesh under deposition temperatures of (a) 15, (b) 25, (c) 35, (d) 45 and (e) 60 °C.

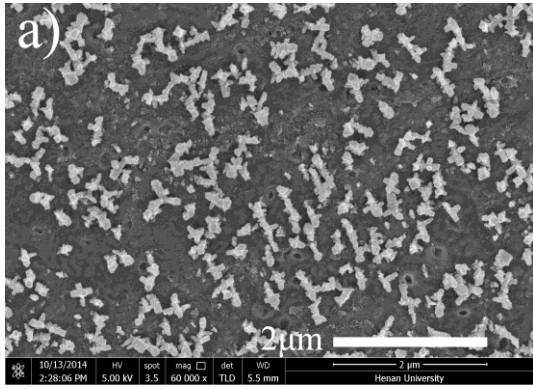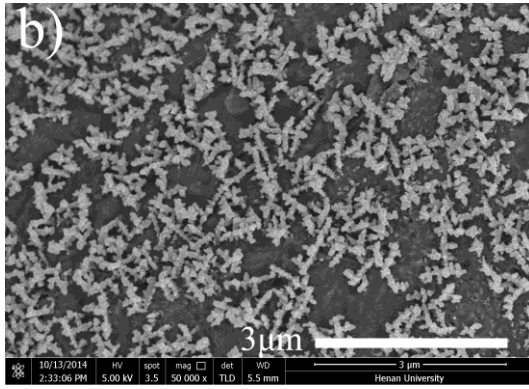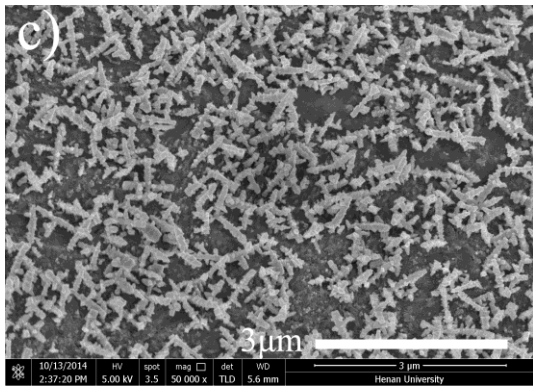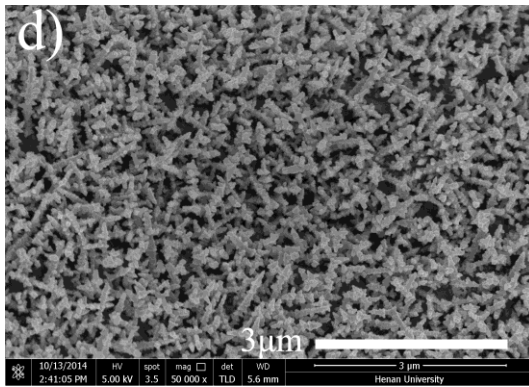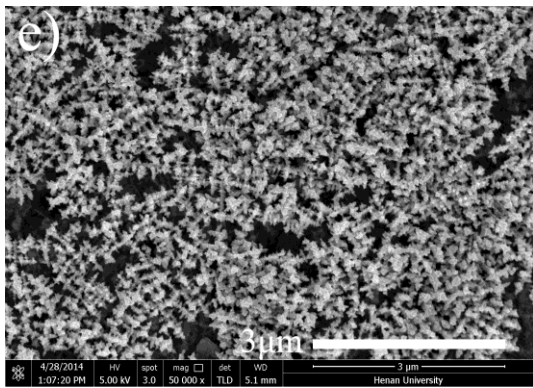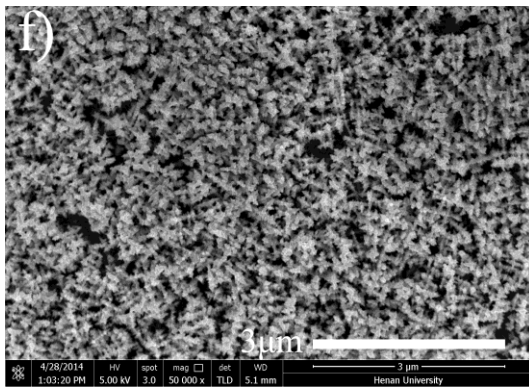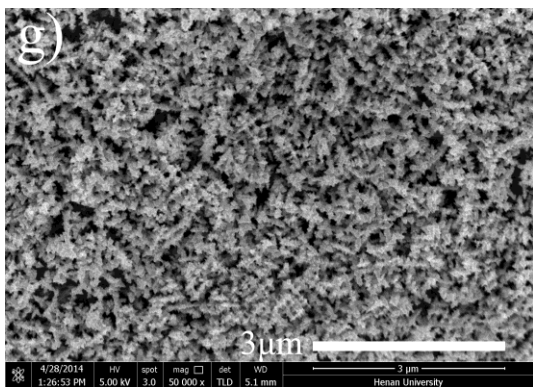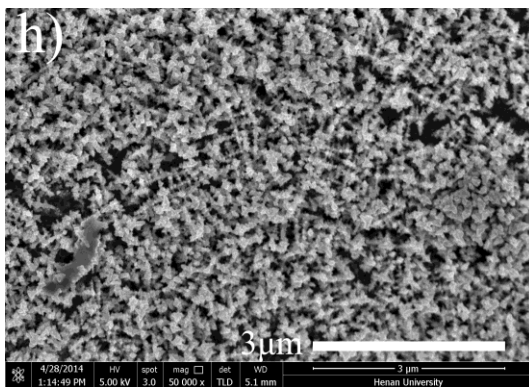

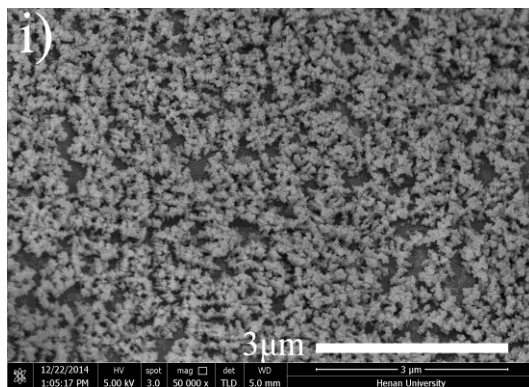

**Figure S5.** High-magnification SEM images of Cu<sub>2</sub>O nanostructures prepared on phosphor-copper mesh under room temperature (about 20 °C) and deposition times of (a) 20 min, (b) 40 min, (c) 1 h, (d) 2 h, (e) 3 h, (f) 6 h, (g) 18 h, (h) 36 h and (i) 288h.

**Table S1: The surface tensions of various tested oils**

| Oil        | Surface tension (mN/m) | temperature (°C) |
|------------|------------------------|------------------|
| Diesel oil | 28.6                   | 30               |
| n-hexane   | 27.5                   | 20               |
| Toluene    | 28.4                   | 20               |
| Chloroform | 27.5                   | 20               |
